# Supplementary material
Source: PubMed Central journal article supplement (PMC1236542)
Supplement: pnas_0503718102_1.pdf [file pnas_0503718102_1.pdf]

Con. 47-TTAAAACTCTAAGGACTTGGCGGTGCCCCAGACCCACCTAGAGGAGCCTGTTCTATAATCGATAACCCACGATGACCCCGACCACTCCTTGCCAAAAGCAGCCTATATACCGCCGTGCCAGCTCACCTGCGCTG

A R1 .....  
A R2 1-1 .....  
A R2 1-2 .....  
A R2 1-3 .....  
A R2 1-4 .....  
A R2 1-5 .....  
A R2 2-1 .....  
A R2 2-2 .....  
A R2 2-3 .....  
A R2 2-4 .....  
A R2 2-5 .....  
A R3 1-1 .....  
A R3 1-2 .....  
A R3 1-3 .....  
A R3 1-4 .....  
A R3 1-5 .....  
A R3 2-1 .....  
A R3 2-2 .....  
A R3 2-3 .....  
A R3 2-4 .....  
A R3 2-5 .....  
W R1 1-1 ..... A .....  
W R1 1-2 ..... C ..... T .....  
W R1 1-3 ..... T .....  
W R1 1-4 .....  
W R2 1-1 ..... A .....  
W R2 1-2 ..... C .....  
W R2 1-3 ..... C ..... A ..... A ..... A ..... A .....  
W R2 1-4 ..... A .....  
W R2 1-5 ..... A .....  
W R2 2-1 .....  
W R2 2-2 .....  
W R2 2-3 .....  
W R2 2-4 .....  
W R2 2-5 .....

Con. 181-AAAGAACAACAGTGAGCATAATAGCCCCAACCCCGCTAACCAAGACAGGTCAAGGTATAGCCTATGGGGTGGAAGAAATGGGCTACATTTTCTAAAATAGATAACCTCACGGAAAGGGACATGAAATTGCCCTT

A R1 .....  
A R2 1-1 .....  
A R2 1-2 .....  
A R2 1-3 .....  
A R2 1-4 .....  
A R2 1-5 .....  
A R2 2-1 .....  
A R2 2-2 .....  
A R2 2-3 .....  
A R2 2-4 .....  
A R2 2-5 .....  
A R3 1-1 .....  
A R3 1-2 .....  
A R3 1-3 .....  
A R3 1-4 .....  
A R3 1-5 .....  
A R3 2-1 .....  
A R3 2-2 .....  
A R3 2-3 .....  
A R3 2-4 .....  
A R3 2-5 .....  
W R1 1-1 .....  
W R1 1-2 .....  
W R1 1-3 .....  
W R1 1-4 .....  
W R2 1-1 .....  
W R2 1-2 ..... T .....  
W R2 1-3 ..... G .....  
W R2 1-4 ..... G .....  
W R2 1-5 .....  
W R2 2-1 ..... G .....  
W R2 2-2 ..... G .....  
W R2 2-3 ..... G .....  
W R2 2-4 ..... G .....  
W R2 2-5 ..... G .....
