# Supplementary material
Source: PubMed Central journal article supplement (PMC1236542)
Supplement: pnas_0503718102_2.pdf [file pnas_0503718102_2.pdf]

Con. 15223 - CTTTTCATCAGTTACCCACATCTGTGCGGACGTTAATTATGGCTGAATCATCCGATATTTACAGCCCAACGGAGCTTCTATATTCTTTATCTGCCTGTACATACATGTGGG

A R1 1-1 .....  
A R1 1-2 .....  
A R1 1-3 .....  
A R1 1-4 .....  
A R1 1-5 .....  
A R1 2-1 .....  
A R1 2-2 .....  
A R1 2-3 .....  
A R1 2-4 .....  
A R1 2-5 .....  
A R2 1-1 ..... A .....  
A R2 1-2 ..... A .....  
A R2 1-3 ..... A .....  
A R2 1-4 .....  
A R2 1-5 .....  
A R2 1-6 .....  
A R2 2-1 ..... A .....  
A R2 2-2 ..... A .....  
A R2 2-3 ..... A .....  
A R2 2-4 .....  
A R2 2-5 .....  
A R2 2-6 .....  
W R1 1-1 .....  
W R1 1-2 .....  
W R1 1-3 .....  
W R1 1-4 .....  
W R1 1-5 .....  
W R1 2-1 .....  
W R1 2-2 .....  
W R1 2-3 .....  
W R1 2-4 .....  
W R1 2-5 .....

Con. 15334 - ACGGGGAATATACTACGGCTCCTACACCTTCTCAGAGACATGAAACATTGGAATCATACTATTATTTACAGTCATAGCCACAGCTTTTATGGGATACGTCTTACCATGAGGC

A R1 1-1 .....  
A R1 1-2 .....  
A R1 1-3 .....  
A R1 1-4 .....  
A R1 1-5 .....  
A R1 2-1 .....  
A R1 2-2 .....  
A R1 2-3 .....  
A R1 2-4 .....  
A R1 2-5 .....  
A R2 1-1 .....  
A R2 1-2 .....  
A R2 1-3 .....  
A R2 1-4 .....  
A R2 1-5 .....  
A R2 1-6 .....  
A R2 2-1 .....  
A R2 2-2 .....  
A R2 2-3 .....  
A R2 2-4 .....  
A R2 2-5 .....  
A R2 2-6 .....  
W R1 1-1 .....  
W R1 1-2 .....  
W R1 1-3 .....  
W R1 1-4 .....  
W R1 1-5 .....  
W R1 2-1 .....  
W R1 2-2 .....  
W R1 2-3 .....  
W R1 2-4 .....  
W R1 2-5 .....
