# Supplementary material
Source: PubMed Central journal article supplement (PMC1236542)
Supplement: pnas_0503718102_3.pdf [file pnas_0503718102_3.pdf]

CRS 16211-CAGCAATCAACCCTCAACTATCACACATCAACTGCAACTCCAAAGCCACCCCTCACCCACTAGGATACCAACAAACCTACCACCCTTAACAGTACATAGTACATAAAGCCATTTACCGTACATAGCACATTACAGTC

A R1 .....  
A R2 .....  
A R3 .....  
A R3 .....G...  
A R3 1-3 .....G...  
A R3 1-4 .....G...  
A R3 1-5 .....G...  
A R4 1-1 .....G...  
A R4 1-2 .....G...  
A R4 1-3 .....G...  
A R4 1-4 .....G...  
A R4 1-5 .....G...  
A R4 2-1 .....G...  
A R4 2-2 .....G...  
A R4 2-3 .....G...  
A R4 2-4 .....G...  
A R4 2-5 .....G...  
W R1 1-2 .....G...  
W R2 1-2 .....G...  
W R3 1-1 .....G...  
W R3 1-2 .....G...  
W R3 1-3 .....G...  
W R3 1-4 .....G...  
W R3 1-5 .....G...  
W R3 2-1 .....G...  
W R3 2-2 .....G...  
W R3 2-3 .....G...  
W R3 2-4 .....G...  
W R3 2-5 .....T.....  
W R4 1-1 .....G...  
W R4 1-2 .....G...  
W R4 1-3 .....C.....T.....  
W R4 1-4 .....T.....  
W R4 1-5 .....G...  
W R4 1-5 .....G...

CRS 16349-AAATCCCTTCTCGTCCCATGGATGACCCCCCTCAGATAGGGGTCCCTTGACCACCATCCTCCGTGAAATCAATATCCCGCACAGAGTGCTACTCTCCTCGCTCCGGGCCATAACACTTGGGGGTAGCTAAAGTG

A R3 1-1 .....A.....  
A R3 1-2 .....A.....  
A R3 1-3 .....A.....  
A R3 1-4 .....A.....  
A R3 1-5 .....A.....  
A R4 1-1 .....A.....  
A R4 1-2 .....A.....  
A R4 1-3 .....A.....  
A R4 1-4 .....A.....  
A R4 1-5 .....A.....  
A R4 2-1 .....A.....  
A R4 2-2 .....A.....  
A R4 2-3 .....A.....  
A R4 2-4 .....A.....  
A R4 2-5 .....A.....  
W R3 1-1 .....C.....A.....  
W R3 1-2 .....A.....  
W R3 1-3 .....A.....  
W R3 1-4 .....A.....  
W R3 1-5 .....A.....  
W R3 2-1 .....A.....  
W R3 2-2 .....A.....  
W R3 2-3 .....A.....  
W R3 2-4 .....A.....  
W R3 2-5 .....A.....  
W R4 1-1 .....A.....  
W R4 1-2 .....A.....  
W R4 1-3 .....A.....  
W R4 1-4 .....A.....  
W R4 1-5 .....A.....
