# Supplementary material
Source: PubMed Central journal article supplement (PMC1236542)
Supplement: pnas_0503718102_4.pdf [file pnas_0503718102_4.pdf]

**Table 4. Primers used in this study**

| Primer                    | Gene | Position            | Sequence                   | Length, bp                      |
|---------------------------|------|---------------------|----------------------------|---------------------------------|
| <i>Bos taurus</i>         | HV1  | F15923 <sup>a</sup> | CCATACACAGACCACAGAAT       | 399                             |
|                           |      | R16302 <sup>a</sup> | TTTAAGAGGAAAGAATGGACC      |                                 |
| <i>Sus scrofa</i>         | CYTB | F14265 <sup>b</sup> | ACATCAGACACAACAACAGC       | 260                             |
|                           |      | R14505 <sup>b</sup> | CCTCAGAATGATATTTGTCC       |                                 |
| <i>Gallus gallus</i>      | CYTB | F14915 <sup>c</sup> | CCCACCCCCTACTAAAAA         | 168                             |
|                           |      | R15065 <sup>c</sup> | AGGCTAGGGATGTGTCTG         |                                 |
| <i>Bos primigenius</i>    | HV1  | F2 <sup>d</sup>     | AGCAAGTACATGACCTCTA        | 121                             |
|                           |      | R103 <sup>d</sup>   | CGTGATCTAATGGTAAGGAA       |                                 |
| <i>Felis catus</i>        | CYTB | F15203 <sup>e</sup> | ACATCAGACACAATAACCG        | 164<br>258                      |
|                           |      | R15347 <sup>e</sup> | GAAGGTGTAGGAGCCGTA         |                                 |
|                           |      | R15446 <sup>e</sup> | CCTCAGAAGGACATTTG          |                                 |
| <i>Pygoscelis adeliae</i> | 12S  | F27 <sup>f</sup>    | AGAACTACGAGCACAAACGC       | 184<br>239<br>307               |
|                           |      | R192 <sup>f</sup>   | TTGGGGCTATTATGCTCAC        |                                 |
|                           |      | R247 <sup>f</sup>   | GTAGCCCATTTCTTCCACC        |                                 |
|                           |      | R314 <sup>f</sup>   | TACTGCTAAATCCGCCTTCC       |                                 |
| <i>Homo sapiens</i>       | HV1  | F16191 <sup>g</sup> | CCCATGCTTACAAGCAAGTA       | 132<br>185<br>239<br>327<br>520 |
|                           |      | R16301 <sup>g</sup> | TGGCTTTATGTACTATGTACTG     |                                 |
|                           |      | R16356 <sup>g</sup> | GTCATCCATGGGGACGAGAA       |                                 |
|                           |      | R16410 <sup>g</sup> | GCGGGATATTGATTTACGG        |                                 |
|                           |      | R16498 <sup>g</sup> | CCTGAAGTAGGAACCAGATG       |                                 |
|                           |      | F15998 <sup>g</sup> | AAGATTCTAATTTAAACTATTCT    |                                 |
| Lambda                    |      | F*                  | GGTTATCGAAATCAGCCACAGCGCC  | 500                             |
|                           |      | R*                  | GATGAGTTCGTGTCCGTACAACCTGG |                                 |

Primers were named by their 5 ends according to gi:60101824 (a), Yang *et al.* (1) (b), Desjardins *et al.* (2) (c), Troy *et al.* (3) (d), Lopez *et al.* (4) (e), Emslie *et al.* (5) (f), and Anderson *et al.* (6) (g).

\*Primers were taken from the Ready-To-Go Lambda Packaging Kit (Amersham Biosciences).

1. Yang, J., Wang, J., Kijas, J., Liu, B., Han, H., Yu, M., Yang, H., Zhao, S. & Li, K. (2003) *J. Hered.* **94**, 381-385.
2. Desjardins, P. & Morais, R. (1990) *J. Mol. Biol.* **212**, 599-634.
3. Troy, C. S., MacHugh, D. E., Bailey, J. F., Magee, D. A., Loftus, R. T., Cunningham, P., Chamberlain, A. T., Sykes, B. C. & Bradley, D. G. (2001) *Nature* **410**, 1088-1091.
4. Lopez, J. V., Cevario, S. & O'Brien, S. J. (1996) *Genomics* **33**, 229-246.
5. Emslie, S. D., Ritchie, P. & Lambert, D. (2003) *Antarctic Res.* **79**, 171-180.
6. Anderson, S., Bankier, A., Barrell, B., Bruijn, M., Coulson, A., Drouuin, J., Eperon, I., Nierlich, D., Roe, B., Sanger, F., *et al.* (1981) *Nature* **290**, 457-465.
